## METHODS &amp; TECHNIQUES

# A framework to unlock marine bird energetics

Ruth E. Dunn<sup>1,2,\*</sup>, James Duckworth<sup>3,\*</sup> and Jonathan A. Green<sup>3</sup>

## ABSTRACT

Energetics can provide novel insights into the roles of animals, but employing an energetics approach has traditionally required extensive empirical physiological data on the focal species, something that can be challenging for those that inhabit marine environments. There is therefore a demand for a framework through which to estimate energy expenditure from readily available data. We present the energetic costs associated with important time- and energy-intensive behaviours across nine families of marine bird (including seabirds, ducks, divers and grebes) and nine ecological guilds. We demonstrate a worked example, calculating the year-round energetic expenditure of the great auk, *Pinguinus impennis*, under three migration scenarios, thereby illustrating the capacity of this approach to make predictions for data-deficient species. We provide a comprehensive framework through which to model marine bird energetics and demonstrate the power of this approach to provide novel, quantitative insights into the influence of marine birds within their ecosystems.

**KEY WORDS:** Energy expenditure, Field metabolic rate, Seabirds, Sea ducks, Time budget, Great auk

## INTRODUCTION

The transfer and storage of energy and nutrients is fundamental for global ecosystem functioning (Bauer and Høye, 2014). Specifically, predators and other consumers play a critical role in the functioning of ecosystems as they transfer energy between trophic levels. Furthermore, their large bodies and high mobility mean that they can act as a vector for the movement of energy and nutrients within habitats and across ecosystem boundaries (Schmitz et al., 2010). The role of wide-ranging consumers is particularly key in marine ecosystems because of their inherent ‘openness’ and the resultant potential for inter-ecosystem linkages (McCauley et al., 2012), yet, paradoxically, these species can be the hardest to study. Indeed, investigating the foraging behaviour, movement ecology and physiology of secretive, wild, marine species is challenging and integrating these elements to calculate energy budgets has only been possible for a small number of shark, whale and pinniped species to date (Bejder et al., 2019; Lowe, 2002; Sparling et al., 2008).

However, the reliance of avifauna on terrestrial breeding grounds means that marine birds (seabirds, ducks, divers and grebes) are relatively accessible, at least for a period of the annual cycle, allowing enhanced insights into their physiology and ecology (Bernard et al., 2021). Indeed, by attaching biologging devices to these animals during their breeding seasons, we now know more than ever about their behaviour, ecology and physiology, whilst they are out of sight within their marine habitats (Croxall et al., 2005; Egevang et al., 2010).

To fuel their energetic requirements, marine birds have evolved to prey on a range of fish and invertebrate species. They adeptly occupy a multitude of foraging niches that range from the capture of flying fish (*Exocoetidae* spp.) from the surface of tropical waters (Lerma et al., 2020), to the retrieval of fishes and squid from depths of over 500 m (Wienecke and Robertson, 1997). In total, marine birds extract almost 100 million tonnes of food each year from a variety of marine habitats, with consequences for ecosystem management (Karpouzi et al., 2007). Indeed, there is demand for energetic studies to provide applied insights into a range of topical issues including potential conflicts with fishing industries (Danckwerts et al., 2014), alterations to governance on discards (Sherley et al., 2020), and the displacement effects of marine developments (Croll et al., 2022). However, despite their relative ease of study in comparison to other marine consumers, our knowledge of the energetics of marine birds remains patchy, varying temporally, spatially and interspecifically.

The energy expenditure of some species of marine bird has been measured using methods such as accelerometry, doubly labelled water and the heart rate method (Green, 2011; Green et al., 2009; Shaffer, 2011). For species where such measurements have not yet been made, we can estimate basal metabolic rate (BMR) via allometric scaling relationships (Ellis and Gabrielsen, 2002). Similarly, estimations of the field metabolic rate (FMR; the sum of energy that a wild animal metabolises over a specified period of time) of breeding seabird species are now increasingly common, thereby allowing inferences into the energetic expenditure and requirements of this group of predators (Dunn et al., 2018). To extrapolate beyond the confines of the breeding seasons of marine birds, year-round biologging devices have been used to determine behavioural time–activity budgets and increasingly also year-round energy budgets, in recognition of the major role of behaviour-specific energetic costs in driving energy budgets (Brown et al., 2023; Buckingham et al., 2023; Burke et al., 2015; Dunn et al., 2020; Elliott and Gaston, 2014). Currently, however, these inferences remain difficult for species where accelerometry, doubly labelled water and heart rate data from the breeding season are not available to aid the interpretation of year-round data. To help unlock the field of energetics for all marine bird researchers, we set out to draw upon the existing knowledge base and present an approach that captures the main energetic costs, enabling the estimation of the daily energy expenditure of any marine bird population at any period in the annual cycle for which time–budget data can be measured or estimated.

<sup>1</sup>Lancaster Environment Centre, Lancaster University, Lancaster, Lancashire, LA1 4YQ, UK. <sup>2</sup>The Lyell Centre, Heriot-Watt University, Edinburgh, Lothian, EH14 4BA, UK. <sup>3</sup>School of Environmental Sciences, University of Liverpool, Liverpool, Merseyside, L3 5DA, UK.

\*These authors contributed equally to the work

‡Author for correspondence (r.e.dunn@lancaster.ac.uk)

 R.E.D., 0000-0003-0927-2734; J.D., 0000-0002-4715-2189; J.A.G., 0000-0001-8692-0163

This is an Open Access article distributed under the terms of the Creative Commons Attribution License (<https://creativecommons.org/licenses/by/4.0>), which permits unrestricted use, distribution and reproduction in any medium provided that the original work is properly attributed.

## MATERIALS AND METHODS

### Compiling marine bird BMR multipliers

We assigned each family of marine bird, as defined by BirdLife International 2023 ([www.datazone.birdlife.org/species/search](http://www.datazone.birdlife.org/species/search)), to one of nine ecological guilds based on expert opinion (R.E.D., J.D. and J.A.G.) of their flight, foraging and resting ecologies (Fig. 1A). We split the relatively speciose Procellariidae into three groups according to intra-family differences in their foraging and flight behaviour: Procellariidae A (flap-gliding surface feeders such as fulmarine petrels, gadfly petrels and prions), B (flapping wing-propelled divers such as diving petrels) and C (flap-gliding wing-propelled divers such as shearwaters).

Between November 2022 and March 2023 inclusive, we performed a search of the peer-reviewed literature available on Google Scholar for studies of marine bird energetics. Searches were conducted for three groups of search terms: (1) 'energ\*', 'metabol\*' and 'duck', (2) 'metabol\*' and 'seabird\*', and (3) 'energ\*' and 'seabird\*'. We restricted our search to 369 species of marine bird, as defined above, omitting the Scolopacidae family (sandpipers) from our analyses because of physiological differences and a general lack of marine dependence in comparison to the other families within the Charadriiformes order, which are also excluded from BirdLife International's list. When looking for values for specific families, we also conducted additional specific searches outside the pre-defined search terms.

We scanned all resultant abstracts for an indication that publications reported estimates of the costs associated with performing different activities and, if appropriate, the full text was skimmed. BMR multiplier values were then either extracted or calculated from the data presented and BMR values cited within the containing text. Where multiple values were available for one family of marine bird, we used an expert judgement approach where we either extracted the activity-specific BMR multiplier that was most up to date, or which we were most confident in, whereby it best reflected free-ranging behaviour, or minimised the number of different sources being used, thereby increasing comparability between activities. Where activity-specific costs were provided as multiples of resting metabolic rate (RMR), we converted RMR values into multipliers of BMR (by dividing the RMR by the BMR multiplier that we had for resting behaviour) to then assist us in also converting the activity-specific costs into multiples of BMR as well. We evaluated which marine bird ecological guilds we had BMR multipliers for. Where values for an ecological guild did not exist, we provide a suggestion of which activity-specific values from other ecological guilds might be most appropriate to use, based on phylogenetic and behavioural similarities.

### Calculating marine bird daily energy expenditure

An animal's external environment and how it allocates time between different costs drives its energetic expenditure (Ricklefs and Wikelski, 2002). To calculate the energy expenditure of any species of marine bird, we therefore followed an established approach whereby the time spent per day in pre-defined activities is multiplied by the species' BMR and an appropriate activity-specific BMR multiplier (Dunn et al., 2020). These values are then summed to give a daily energy expenditure.

If species-specific values for BMR from empirical data are not available, family-specific estimates for a number of seabird families are provided within Ellis and Gabrielsen (2002) and should be used where possible. Alternatively, allometric scaling equations can be used to parameterise the unknown physiological metrics that influence a wild animal's energy budget: BMR, lower critical

temperature and thermal conductance. Initially, based on an individual's body mass (g), we can calculate its BMR ( $\text{kJ h}^{-1}$ ). This could be a single estimate for the year, or a range of values incorporating temporal variation if this is known. BMR can be calculated as the average of two relationships (Eqns 1A and 1B) previously presented for seabirds and ducks (Ellis and Gabrielsen, 2002; McKinney and McWilliams, 2005):

$$\text{BMR} = \frac{3.201 \times \text{body mass}^{0.719}}{24}, \quad (1A)$$

$$\text{BMR} = \frac{4.05 \times \text{body mass}^{0.79}}{1000} \times 18.8. \quad (1B)$$

When selecting which activity-specific BMR multipliers to use, those obtained for the ecological guild adopted by the species' family should be considered (Fig. 1). When a full set of activity-specific BMR multipliers are not available for a particular ecological guild, the most appropriate activity-specific BMR multipliers, determined via the species' ecology and physiology, should be selected, possibly from across multiple ecological guilds.

When data on the environmental temperatures experienced by an individual are available, we can also incorporate activity-specific thermoregulatory energetic costs within our energy budget calculations to improve estimates, particularly for time periods when birds are inactive. To estimate these, we must first calculate the individual's lower critical temperature (LCT;  $^{\circ}\text{C}$ ), the temperature below which an additional cost of thermoregulation is incurred (Kendeigh et al., 1977):

$$\text{LCT} = 47.2 \times \text{body mass}^{-0.18}. \quad (2)$$

Using equations previously presented for aquatic birds, we can also calculate the individual's thermal conductance (TC;  $\text{kJ h}^{-1} \text{ }^{\circ}\text{C}^{-1} \text{ kg}^{-1}$ ) when submerged in water, sitting on water, or in air (De Vries and Van Eerden, 1995):

$$\text{TC}_{\text{in water}} = 3.47 \times \frac{\text{body mass}^{-0.573}}{1000}, \quad (3A)$$

$$\text{TC}_{\text{on water}} = 1.532 \times \frac{\text{body mass}^{-0.546}}{1000}, \quad (3B)$$

$$\text{TC}_{\text{air}} = 0.705 \times \frac{\text{body mass}^{-0.461}}{1000}. \quad (3C)$$

We can then correspond these thermal conductance values to the activities performed by different species of marine bird. For example, the  $\text{TC}_{\text{in water}}$  value might be used for species that swim and forage with their entire bodies beneath the water surface,  $\text{TC}_{\text{on water}}$  might be used for species that spend time either resting or being active on the surface of the water, and  $\text{TC}_{\text{air}}$  might be used for species that spend time on land. We assume that when in flight, marine birds use active flapping flight producing excess heat that compensates for any thermoregulatory requirements (Schraft et al., 2019), and/or live in tropical habitats, and/or have other adaptations, such as darker wings, which compensate for the costs of thermoregulation and help maintain thermoneutrality (Rogalla et al., 2021). Furthermore, we exclude other less consequential sources of energy expenditure such as digestion, growth, reproduction, moult and variation in resting costs.

When environmental temperatures (sea surface temperature or the temperature of air, depending on the activity) fall below an individual's LCT during time spent (h) in relevant activities, the energetic costs of thermoregulation (kJ) can be calculated

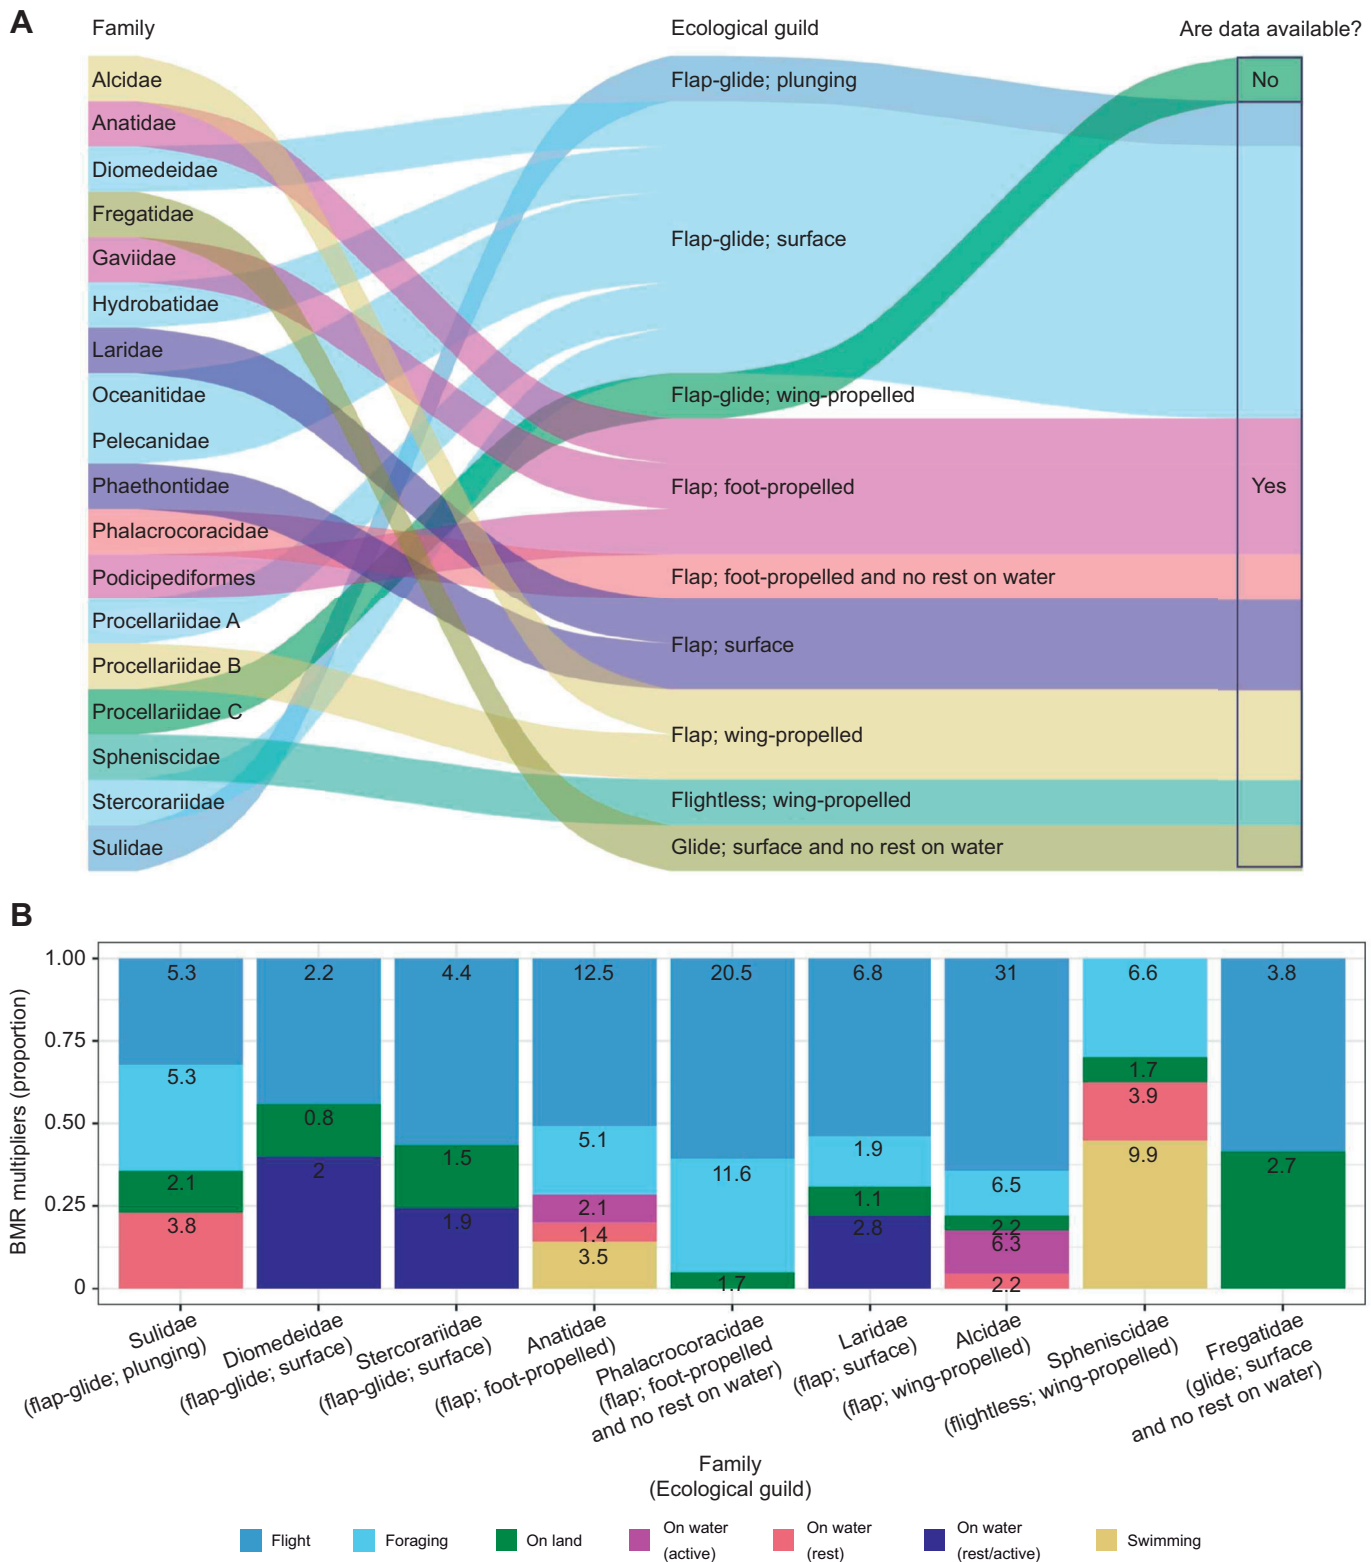

**Fig. 1. The ecological guilds and basal metabolic rate (BMR) multipliers of marine bird families.** (A) The nine marine bird ecological guilds and whether BMR multiplier data are available for them. There are 16 families of marine birds and the relatively speciose Procellariidae have been split into three classifications according to the variation in their foraging and flight behaviour: Procellariidae A (fulmarine petrels, gadfly petrels and prions), B (diving petrels) and C (shearwaters). The ecological guilds are based on predominant flight style (flap, glide, flap-glide or flightless), foraging style (plunge diving, surface feeding, wing-propelled diving or foot-propelled diving), and whether the bird rests on land and/or on water (or not). (B) The activity-specific BMR multipliers for nine families of marine birds represented as within-family proportions, with the value of each activity- and family-specific BMR multiplier labelled.

as follows:

$$\begin{aligned} \text{Thermoregulatory costs} &= \text{degrees below LCT} \\ &\times \frac{\text{body mass}}{1000} \times \text{TC} \\ &\times \text{time in activity.} \end{aligned} \quad (4)$$

Ultimately, marine bird energy expenditure can be calculated as the sum of activity-specific energetic costs and thermoregulatory costs.

### Year-round energy expenditure by the great auk

To demonstrate the capacity of our approach to address ecological concepts, we calculated the year-round daily energy expenditure of a great auk, *Pinguinus impennis* (Linnaeus, 1758), a species made extinct in 1884 (Bengtson, 1984). Initially, based on year-round empirical data from a closely related extant species (common guillemot, *Uria aalge*), we constructed theoretical year-round activity budgets and extracted environmental temperature data based on three theoretical migration scenarios: (A) the great auk stayed close to its breeding colony throughout the year and returned to land during the night (similar to populations of gentoo penguin, *Pygoscelis papua*; Tanton et al., 2004), (B) the great auk stayed close to its breeding colony throughout the year and stayed at sea during the night when not under the constraints of the breeding season (similar to populations of common guillemot; Harris et al., 2015), (C) outside the breeding season, the great auk undertook large migratory journeys to distinct wintering grounds (similar to populations of Atlantic puffins, *Fratercula arctica*; Fayet et al., 2016). We created a set of simulations, detailed in the [Supplementary Materials and Methods](#), and, given the ecology and physiology of great auks (Bengtson, 1984), we derived activity-specific costs from values obtained for a wing-propelled, non-flying bird that does rest on water ([Fig. 1B](#) and [Table 1](#)). Ultimately, we were able to combine these input data and activity-specific BMR multipliers to simulate the activity budget and corresponding variation in energetic expenditure of a representative individual great auk under three migration scenarios.

## RESULTS AND DISCUSSION

We obtained activity-specific BMR multipliers from nine families of marine bird: Alcidae, Anatidae, Laridae, Fregatidae, Phalacrocoracidae, Diomedidae, Spheniscidae, Stercorariidae and Sulidae ([Table 1](#)). The foraging, flight and resting behaviours of these nine families encompassed eight of the nine ecological guilds that we had grouped the families into: flap-gliding plunge divers, flap-gliding surface feeders, flapping foot-propelled divers, flapping foot-propelled divers that do not rest on water, flapping surface feeders, flapping wing-propelled divers, gliding surface feeders, and flightless wing-propelled divers ([Fig. 1A](#)). Another nine families, for which we were not able to find activity-specific BMR multipliers, could be assigned to one of these eight ecological guilds based on the assumption that their multipliers would be similar ([Fig. 1A](#)). We were not able to find data for flap-gliding wing-propelled divers (i.e. 'Procellariidae C', shearwaters) and, instead, we encourage the use of activity-specific multipliers from closely related species and those with similar ecological guilds (detailed in [Table 1](#)). For example, multipliers for flight and 'on water' could be borrowed from other closely related families that employ flap-gliding and that rest on water, and multipliers for foraging could be taken from other wing-propelled foragers such as

the Alcidae family. Future studies that seek to quantify the activity-specific energetic costs of shearwaters would be extremely valuable with regards to closing this outstanding knowledge gap.

There was variation in the magnitude of the BMR multipliers between the different families of marine bird. Flight costs were high in comparison to the energetic costs associated with other activities across taxa ([Fig. 1B](#)). Our cross-taxa data collation confirms that flight was particularly costly for Alcidae species (31×BMR), which have wings that are evolved for optimal dive performance but are less efficient when used for flapping flight (Elliott et al., 2013). Contrastingly, Diomedidae species have low energetic costs associated with their flight activity (2.2×BMR) in addition to their time spent on land (0.8×BMR) or on water (2×BMR) ([Fig. 1B](#)), with take-offs hypothesised to be their most expensive activity because of the requirement of continuous, costly flapping (Sakamoto et al., 2013). Flight is also costly for Phalacrocoracidae (20.5×BMR) because of their wings not being optimised solely for flight but also to reduce drag and buoyancy during underwater foraging (Stothart et al., 2016).

In recognition of the major role of behaviour-specific energetic costs in driving energy budgets, time–energy budgets have long been used to estimate daily energy expenditure across a range of marine bird taxa (Bunce, 2001; Fort et al., 2011; Grémillet et al., 1995; Regular et al., 2014; Votier et al., 2004), including, increasingly, outside the breeding season (Buckingham et al., 2023; Dunn et al., 2022; Elliott and Gaston, 2014; Grémillet et al., 2005). Our framework expands on these single species studies and the activity-specific BMR multipliers compiled in [Fig. 1B](#) can be combined with BMR estimates, empirical activity budget data and, where available, thermal conductance estimates and environmental temperature data to estimate the daily energy expenditure of any population of marine bird. Like any similar time–energy budget study, estimates are dependent on and sensitive to the values of BMR used. We demonstrate how to estimate BMR from published body mass alone, but any further information on species-, population- or individual-specific measures of body mass can be used within Eqns 1A and 1B to improve estimates of BMR. Even better would be to use taxon- or species-specific BMR measurements or relationships between mass and BMR (e.g. Ellis and Gabrielsen, 2002) and any known influences on BMR, as this can also vary as a result of ecological effects, temporal variation and measurement differences (McKechnie and Wolf, 2004). Other species-specific insights might include known relationships between mass and thermal conductance, or other known aspects of activity-specific rates of energy expenditure. Further data streams that would improve estimates include knowledge of depth- and duration-related variation in the energetic costs of diving (as in Elliott et al., 2013; Knowler Stockard et al., 2005). Furthermore, birds might expend different amounts of energy whilst 'on land' as a result of the differing costs associated with egg incubation, brooding young chicks and then rearing them (Green et al., 2013), or being engaged in different behaviours such as resting, preening, walking or wing stretching (Grémillet et al., 1995). Additionally, our findings reveal some scope for variation in activity costs within ecological guilds, and we therefore encourage future studies to use species-specific BMR multipliers where they are available, and also to generate new multipliers to both unlock insights into individual species and improve this approach overall. This being said, the framework that we outline here allows the incorporation of nuances via the optional addition of location-specific thermoregulatory costs when environmental temperature data (usually air and sea surface) are available (Eqns 2 and 3). In this way, informed estimates of daily

**Table 1. Collation of activity-specific energetic costs for all families of marine birds**

| Family                                                      | Flight style | Dive style      | Rest style             | Activity                                                                                                                                                                                                                                                                                                                                                                                     | Energetic cost ( $\times$ BMR) | Source                    |
|-------------------------------------------------------------|--------------|-----------------|------------------------|----------------------------------------------------------------------------------------------------------------------------------------------------------------------------------------------------------------------------------------------------------------------------------------------------------------------------------------------------------------------------------------------|--------------------------------|---------------------------|
| Alcidae, auks                                               | Flapping     | Wing-propelled  | Does rest on water     | Flight                                                                                                                                                                                                                                                                                                                                                                                       | 31                             | Elliott et al., 2013      |
|                                                             |              |                 |                        | Foraging                                                                                                                                                                                                                                                                                                                                                                                     | 6.5                            | Dunn et al., 2022         |
|                                                             |              |                 |                        | On land                                                                                                                                                                                                                                                                                                                                                                                      | 2.2                            | Elliott and Gaston, 2014  |
| Anatidae, ducks                                             | Flapping     | Foot-propelled  | Does rest on water     | On water (active)                                                                                                                                                                                                                                                                                                                                                                            | 6.3                            |                           |
|                                                             |              |                 |                        | On water (rest)                                                                                                                                                                                                                                                                                                                                                                              | 2.2                            |                           |
|                                                             |              |                 |                        | Flight                                                                                                                                                                                                                                                                                                                                                                                       | 12.5                           | Woolley and Owen, 1978    |
| Diomededidae, albatrosses                                   | Flap-gliding | Surface feeding | Does rest on water     | Foraging                                                                                                                                                                                                                                                                                                                                                                                     | 5.1                            | de Leeuw, 1996            |
|                                                             |              |                 |                        | On water (active)                                                                                                                                                                                                                                                                                                                                                                            | 2.1                            | Morton et al., 1989       |
|                                                             |              |                 |                        | On water (rest)                                                                                                                                                                                                                                                                                                                                                                              | 1.4                            | Woolley and Owen, 1978    |
| Fregatidae, frigatebirds                                    | Gliding      | Surface feeding | Does not rest on water | Swimming                                                                                                                                                                                                                                                                                                                                                                                     | 3.5                            | Butler, 2000              |
|                                                             |              |                 |                        | Flight                                                                                                                                                                                                                                                                                                                                                                                       | 2.2                            | Bevan et al., 1997        |
|                                                             |              |                 |                        | On land                                                                                                                                                                                                                                                                                                                                                                                      | 0.8*                           |                           |
| Gaviidae, divers                                            | Flapping     | Foot-propelled  | Does rest on water     | On water (rest/active)                                                                                                                                                                                                                                                                                                                                                                       | 2.0                            | Weimerskirch et al., 2016 |
|                                                             |              |                 |                        | Flight                                                                                                                                                                                                                                                                                                                                                                                       | 3.8                            | Dearborn et al., 2005     |
|                                                             |              |                 |                        | On land                                                                                                                                                                                                                                                                                                                                                                                      | 2.7                            |                           |
| Hydrobatidae, northern storm petrels                        | Flap-gliding | Surface feeding | Does rest on water     | Use values from other flapping, foot-propelled diving families that rest on water, e.g. Anatidae.                                                                                                                                                                                                                                                                                            |                                |                           |
|                                                             |              |                 |                        | Use values from other flap-gliding, surface feeding families that rest on water, e.g. Diomededidae or Stercorariidae.                                                                                                                                                                                                                                                                        |                                |                           |
|                                                             |              |                 |                        | Use values from other flap-gliding, surface feeding families that rest on water, e.g. Diomededidae or Stercorariidae.                                                                                                                                                                                                                                                                        |                                |                           |
| Laridae, gulls                                              | Flapping     | Surface feeding | Does rest on water     | Flight                                                                                                                                                                                                                                                                                                                                                                                       | 6.8                            | Jodice et al., 2003       |
|                                                             |              |                 |                        | Foraging                                                                                                                                                                                                                                                                                                                                                                                     | 1.9                            |                           |
|                                                             |              |                 |                        | On land                                                                                                                                                                                                                                                                                                                                                                                      | 1.1                            |                           |
| Oceanitidae, austral storm petrels                          | Flap-gliding | Surface feeding | Does rest on water     | 2.8                                                                                                                                                                                                                                                                                                                                                                                          |                                |                           |
|                                                             |              |                 |                        | Use values from other flap-gliding, surface feeding families that rest on water, e.g. Diomededidae or Stercorariidae.                                                                                                                                                                                                                                                                        |                                |                           |
|                                                             |              |                 |                        | Use values from other flap-gliding, surface feeding families that rest on water, e.g. Diomededidae or Stercorariidae.                                                                                                                                                                                                                                                                        |                                |                           |
| Pelecanidae, pelicans                                       | Flap-gliding | Surface feeding | Does rest on water     | Use values from other flap-gliding, surface feeding families that rest on water, e.g. Diomededidae or Stercorariidae.                                                                                                                                                                                                                                                                        |                                |                           |
|                                                             |              |                 |                        | Use values from other flap-gliding, surface feeding families that rest on water, e.g. Diomededidae or Stercorariidae.                                                                                                                                                                                                                                                                        |                                |                           |
|                                                             |              |                 |                        | Use values from the other flapping, surface feeding family that rests on water, e.g. Laridae.                                                                                                                                                                                                                                                                                                |                                |                           |
| Phaethonidae, tropicbirds                                   | Flapping     | Surface feeding | Does rest on water     | Flight                                                                                                                                                                                                                                                                                                                                                                                       | 20.5                           | Grémillet et al., 2003    |
|                                                             |              |                 |                        | Foraging                                                                                                                                                                                                                                                                                                                                                                                     | 11.6                           |                           |
|                                                             |              |                 |                        | On land                                                                                                                                                                                                                                                                                                                                                                                      | 1.7                            |                           |
| Phalacrocoracidae, cormorants                               | Flapping     | Foot-propelled  | Does not rest on water | Foraging                                                                                                                                                                                                                                                                                                                                                                                     |                                |                           |
|                                                             |              |                 |                        | On land                                                                                                                                                                                                                                                                                                                                                                                      |                                |                           |
|                                                             |              |                 |                        | Use values from the other flapping, foot-propelled diving family that rests on water, e.g. Anatidae.                                                                                                                                                                                                                                                                                         |                                |                           |
| Podicipedidae, grebes                                       | Flapping     | Foot-propelled  | Does rest on water     | Use values from other flap-gliding, surface feeding families that rest on water, e.g. Diomededidae or Stercorariidae.                                                                                                                                                                                                                                                                        |                                |                           |
|                                                             |              |                 |                        | Use values from other flap-gliding, surface feeding families that rest on water, e.g. Diomededidae or Stercorariidae.                                                                                                                                                                                                                                                                        |                                |                           |
|                                                             |              |                 |                        | Use values from other flap-gliding, surface feeding families that rest on water, e.g. Diomededidae or Stercorariidae.                                                                                                                                                                                                                                                                        |                                |                           |
| Procellariidae A, fulmarine petrels, gadfly petrels, prions | Flap-gliding | Surface feeding | Does rest on water     | Use values from other flap-gliding, surface feeding families that rest on water, e.g. Diomededidae or Stercorariidae.                                                                                                                                                                                                                                                                        |                                |                           |
|                                                             |              |                 |                        | Use values from other flap-gliding, surface feeding families that rest on water, e.g. Diomededidae or Stercorariidae.                                                                                                                                                                                                                                                                        |                                |                           |
|                                                             |              |                 |                        | Use values from other flap-gliding, surface feeding families that rest on water, e.g. Diomededidae or Stercorariidae.                                                                                                                                                                                                                                                                        |                                |                           |
| Procellariidae B, diving petrels                            | Flapping     | Wing-propelled  | Does rest on water     | Use values from other flapping, wind-propelled diving families that rest on water, e.g. Alcidae.                                                                                                                                                                                                                                                                                             |                                |                           |
|                                                             |              |                 |                        | Use values from other flapping, wind-propelled diving families that rest on water, e.g. Alcidae.                                                                                                                                                                                                                                                                                             |                                |                           |
|                                                             |              |                 |                        | Use values from other flapping, wind-propelled diving families that rest on water, e.g. Alcidae.                                                                                                                                                                                                                                                                                             |                                |                           |
| Procellariidae C, shearwaters                               | Flap-gliding | Wing-propelled  | Does rest on water     | For flight, use values from other flap-gliding families, e.g. Diomededidae, Stercorariidae and/or Sulidae; for foraging, use values from other wing-propelled foragers, e.g. Alcidae and/or Spheniscidae; for resting on water, use values from another closely related species, e.g. Diomededidae; for resting on land, use values from another closely related species, e.g. Diomededidae. |                                |                           |
|                                                             |              |                 |                        | Foraging                                                                                                                                                                                                                                                                                                                                                                                     | 6.6                            | Nagy et al., 1984         |
|                                                             |              |                 |                        | On land                                                                                                                                                                                                                                                                                                                                                                                      | 1.7                            |                           |
| Spheniscidae, penguins                                      | Flightless   | Wing-propelled  | Does rest on water     | On water (rest)                                                                                                                                                                                                                                                                                                                                                                              | 3.9                            |                           |
|                                                             |              |                 |                        | Swimming                                                                                                                                                                                                                                                                                                                                                                                     | 9.9                            |                           |
|                                                             |              |                 |                        | Flight                                                                                                                                                                                                                                                                                                                                                                                       | 4.4                            | Votier et al., 2004       |
| Stercorariidae, skuas                                       | Flap-gliding | Surface feeding | Does rest on water     | On land                                                                                                                                                                                                                                                                                                                                                                                      | 1.5                            |                           |
|                                                             |              |                 |                        | On water (rest/active)                                                                                                                                                                                                                                                                                                                                                                       | 1.9                            |                           |
|                                                             |              |                 |                        | Flight                                                                                                                                                                                                                                                                                                                                                                                       | 5.3                            | Birt-Friesen et al., 1989 |
| Sulidae, gannets and boobies                                | Flap-gliding | Plunge-diving   | Does rest on water     | Foraging                                                                                                                                                                                                                                                                                                                                                                                     | 5.3                            |                           |
|                                                             |              |                 |                        | On land                                                                                                                                                                                                                                                                                                                                                                                      | 2.1                            |                           |
|                                                             |              |                 |                        | On water (rest)                                                                                                                                                                                                                                                                                                                                                                              | 3.8                            |                           |

The table shows the flight styles, dive styles and rest styles (i.e. the elements of their ecology that compose their ecological guild) as well as the energetic costs (as multipliers of basal metabolic rate, BMR) of the different activities that form the birds' activity budgets. \*The multiplier is less than BMR because respirometry measurements are known to overestimate the BMR of Diomededidae, with consequences for allometric equations (Weimerskirch et al., 2002).

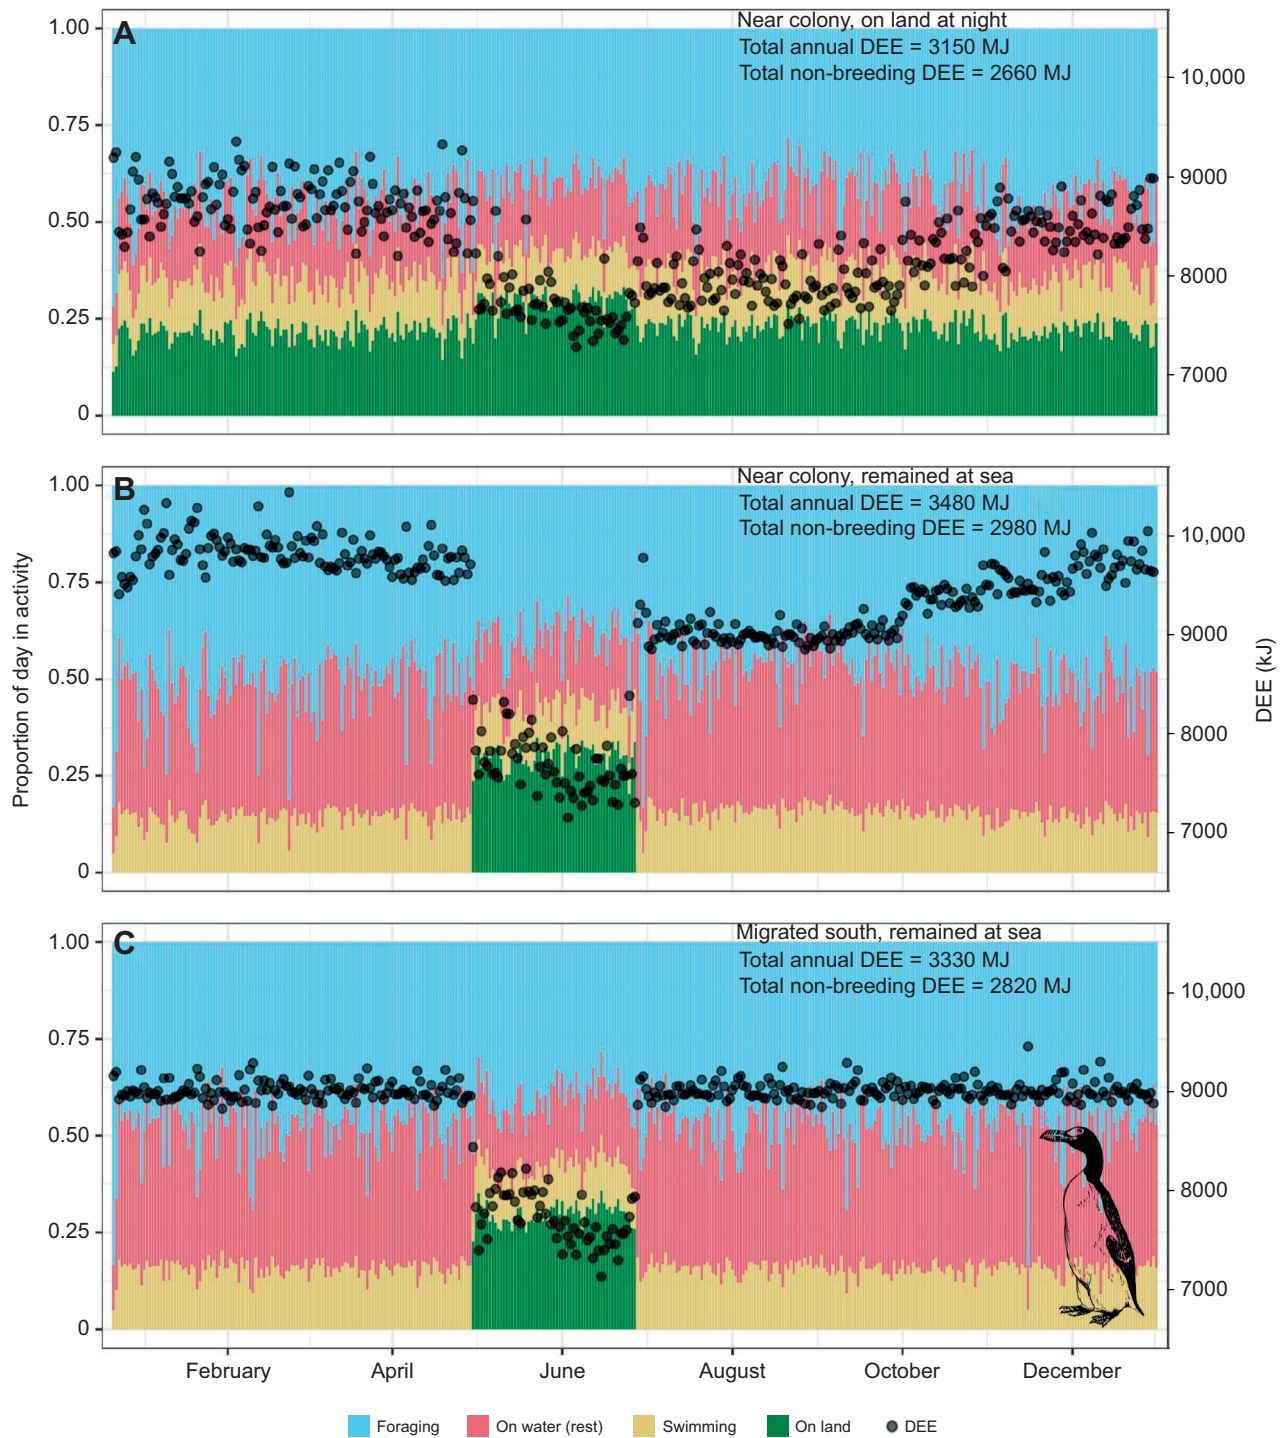

**Fig. 2. A theoretical reproduction of the daily energy expenditure of a great auk, *Pinguinus impennis*, through an annual cycle under three migration scenarios.** (A) The bird stayed close to its breeding colony throughout the year and returned to land during the night. (B) The bird stayed close to its breeding colony throughout the year and stayed at sea during the night when not under the constraints of the breeding season. (C) Outside the breeding season, the bird undertook large migratory journeys to distinct wintering grounds. Daily energy expenditure (DEE) estimates (circles) were calculated based on theoretical behavioural budgets (coloured stacked bars) and estimates of foraging efficiency, combined with activity-specific BMR multipliers and theoretical BMR and thermoregulatory costs derived from allometric scaling equations. Great auk image ©Openclipart.

energy expenditure can be generated for marine birds at any point throughout the annual cycle where activity budget data are available.

To demonstrate the flexibility and potential of our approach for answering broad-scale questions about animal energetics, we

provide a case study in which we estimated the year-round daily energy expenditure of the great auk, a marine bird species that lacks comprehensive physiological information and empirical data because it was hunted to extinction in 1884 (Bengtson, 1984). We were able to reconstruct energy budgets under three plausible

migration/non-breeding scenarios (based on strategies employed by extant species with similar lifestyles) considering temporal changes in activity budgets, and both spatial and temporal variation in temperature. We showed that if, during the non-breeding season, the great auk made diurnal trips to sea to forage and returned to land during the night (similar to South Georgian gentoo penguins; Tanton et al., 2004), it would have expended approximately 12% less energy than if it had stayed at sea throughout the entire non-breeding period (Fig. 2). Furthermore, remaining within cool Arctic oceans would have incurred an approximate 5% increase in energy expenditure throughout the non-breeding period relative to that expended if it had adopted a southern migration to the Atlantic Ocean near Morocco (the southernmost location that great auk bones have been found; Campmas et al., 2010), driven by cooler sea surface temperatures and consequent increased thermoregulatory costs (Dunn et al., 2020). Although the breeding season is typically an expensive period for marine birds, with high associated energetic costs (Dunn et al., 2018), we did not account for the intrinsic costs of reproduction (including egg development and chick provisioning) within our simulation and therefore observed comparatively low energetic costs associated with colony attendance during May and June (Fig. 2). This being said, the patterns in daily energy expenditure that we observed are not dissimilar to those observed across multiple colonies of common guillemot, an extant species that is one of the great auk's closest relatives (Buckingham et al., 2023). During this period, assuming an assimilation efficiency of 74.4% (as in Brünnich's guillemot, *Uria lomvia*; Brekke and Gabrielsen, 1994), the great auk would have had to consume  $5790 \pm 248$  kJ day<sup>-1</sup> of prey in order to maintain its body mass, or  $36 \pm 2$  sand lance *Ammodytes dubius* (assuming the energy content of a 20 cm sand lance was 158 kJ; Bowen et al., 2002). Our ability to reconstruct the energy expenditure of the great auk, a hugely data-deficient species, and investigate intra-annual variability in its energetics demonstrates both the power and flexibility of our approach, as well as its utility in exploring novel ecological scenarios and concepts.

Here, we have outlined an approach that can be used to estimate the daily energy expenditure of marine bird species at any time throughout the annual cycle with varying degrees of accuracy depending on the availability of empirical data. While subtleties such as small changes in body mass or time-limited activities such as reproduction might not be captured, this approach still enables us to evaluate patterns in energy expenditure and answer comparative questions. We advocate that this approach is employed to help quantify the influence marine birds exert on the ecosystems they inhabit, in addition to how they might be affected by anthropogenic impacts. For example, studying marine bird energetics has allowed the quantification of the prey that seabirds might consume (Brooke, 2004; Cury et al., 2011) as well as the quantities of nutrients that they then transfer from their marine foraging habitats to their terrestrial breeding sites and adjacent nearshore systems (Graham et al., 2018). Our approach also provides a timely tool through which to quantify the impacts of emerging catalysts for changes to marine bird activity budgets, energetics and consequent demographics, such as fisheries interactions (Searle et al., 2023), wind farm developments (Masden et al., 2010), increased storminess (Fort et al., 2009) and temperature changes (Oswald and Arnold, 2012). Indeed, quantifying the energetics of an individual bird can allow the development of insights into population dynamics, as individuals must balance their energetic budgets to ensure survival (Tomlinson et al., 2014), as well as provide answers to questions regarding evolutionary theory (Ballance et al., 2009). Furthermore, the framework presented

here may also set a precedent for the creation and use of standardised workflows for the study of other taxa.

#### Acknowledgements

Both first authors contributed equally to this work and gave permission for the order of authorship to reflect this within personal and professional documents.

#### Competing interests

The authors declare no competing or financial interests.

#### Author contributions

Conceptualization: J.D.; Methodology: R.E.D., J.D., J.A.G.; Formal analysis: R.E.D., J.D.; Investigation: R.E.D., J.D., J.A.G.; Data curation: R.E.D., J.D.; Writing - original draft: R.E.D.; Writing - review & editing: J.D., J.A.G.; Visualization: R.E.D.; Supervision: J.A.G.

#### Funding

R.E.D. was funded by the Bertarelli Foundation and so this work contributes to the Bertarelli Programme in Marine Science. J.A.D. was funded by the Natural Environment Research Council (NERC) ACCE Doctoral Training Partnership. Open Access funding provided by Lancaster University. Deposited in PMC for immediate release.

#### Data availability

An R script containing the simulation of the year-round activity and energy budgets of a great auk is available (open access) from GitHub: [https://github.com/RuthDunn/marine\\_bird\\_energetics/](https://github.com/RuthDunn/marine_bird_energetics/). No new data were collected for the study.

#### ECR Spotlight

This article has an associated ECR Spotlight interview with Ruth Dunn and James Duckworth.

#### References

- Ballance, L. T., Ainley, D. G., Ballard, G. and Barton, K. (2009). An energetic correlate between colony size and foraging effort in seabirds, an example of the Adélie penguin *Pygoscelis adeliae*. *J. Avian Biol.* **40**, 279-288. doi:10.1111/j.1600-048X.2008.04538.x
- Bauer, S. and Hoyer, B. J. (2014). Migratory animals couple biodiversity and ecosystem functioning worldwide. *Science* **344**, 1242552. doi:10.1126/science.1242552
- Bejder, L., Videsen, S., Hermannsen, L., Simon, M., Hanf, D. and Madsen, P. T. (2019). Low energy expenditure and resting behaviour of humpback whale mother-calf pairs highlights conservation importance of sheltered breeding areas. *Sci. Rep.* **9**, 1-11. doi:10.1038/s41598-018-36870-7
- Bengtson, S.-A. (1984). Breeding ecology and extinction of the great auk (*Pinguinus impennis*): Anecdotal evidence and conjectures. *Auk* **101**, 1-12. doi:10.1093/auk/101.1.1
- Bernard, A., Rodrigues, A. S. L., Cazalis, V. and Grémillet, D. (2021). Toward a global strategy for seabird tracking. *Conserv. Lett.* **14**, e12804. doi:10.1111/conl.12804
- Bevan, R. M., Butler, P. J., Woakes, A. J. and Prince, P. A. (1997). The energy expenditure of free-ranging black-browed albatross. *Philos. Trans. R. Soc. Lond. B Biol. Sci.* **350**, 119-131.
- Birt-Friesen, V. L., Montevecchi, W. A., Cairns, D. K. and Macko, S. A. (1989). Activity-specific metabolic rates of free-living northern gannets and other seabirds. *Ecology* **71**, 1257-1257. doi:10.2307/1938262
- Bowen, W. D., Tully, D., Boness, D. J., Bulheier, B. M. and Marshall, G. J. (2002). Prey-dependent foraging tactics and prey profitability in a marine mammal. *Mar. Ecol. Prog. Ser.* **244**, 235-245. doi:10.3354/meps244235
- Brekke, B. and Gabrielsen, G. W. (1994). Assimilation efficiency of adult Kittiwakes and Brünnich's guillemots fed capelin and Arctic cod. *Polar Biol.* **14**, 279-284. doi:10.1007/BF00239177
- Brooke, M. d. L. (2004). The food consumption of the world's seabirds. *Proc. R. Soc. B* **271**, S246-S248.
- Brown, J. M., Bouten, W., Camphuysen, K. C. J., Nolet, B. A. and Shamoun-Baranes, J. (2023). Energetic and behavioral consequences of migration: an empirical evaluation in the context of the full annual cycle. *Sci. Rep.* **13**, 1-15. doi:10.1038/s41598-022-26890-9
- Buckingham, L., Daunt, F., Bogdanova, M. I., Furness, R. W., Bennett, S., Duckworth, J., Dunn, R. E., Wanless, S., Harris, M. P., Jardine, D. C. et al. (2023). Energetic synchrony throughout the non-breeding season in common guillemots from four colonies. *J. Avian Biol.* **2023**, e03018. doi:10.1111/jav.03018
- Bunce, A. (2001). Prey consumption of Australasian gannets (*Morus serrator*) breeding in Port Phillip Bay, southeast Australia, and potential overlap with commercial fisheries. *ICES J. Mar. Sci.* **58**, 904-915. doi:10.1006/jmsc.2001.1083

- Burke, C. M., Montevecchi, W. A. and Regular, P. M. (2015). Seasonal variation in parental care drives sex-specific foraging by a monomorphic seabird. *PLoS One* **10**, 1-22.
- Butler, P. J. (2000). Energetic costs of surface swimming and diving of birds. *Physiol. Biochem. Zool.* **73**, 699-705. doi:10.1086/318111
- Campmas, E., Laroulandie, V., Michel, P., Amani, F., Nespoulet, R. and Mohammed, A. E. H. (2010). A Great Auk (*Pinguinus impennis*) in North Africa: Discovery of a bone remain in Neolithic layer of El Harhoura 2 Cave (Temara, Morocco). In *Birds in Archaeology: Proceedings of the 6th Meeting of the ICAZ Bird Working Group in Groningen*, pp. 1-233. Barkhuis.
- Croll, D. A., Ellis, A. A., Adams, J., Cook, A. S. C. P., Garthe, S., Goodale, M. W., Hall, C. S., Hazen, E., Keitt, B. S., Kelsey, E. C. et al. (2022). Framework for assessing and mitigating the impacts of offshore wind energy development on marine birds. *Biol. Conserv.* **276**, 109795. doi:10.1016/j.biocon.2022.109795
- Croxall, J. P., Silk, J. R. D., Phillips, R. A., Afanasyev, V. and Briggs, D. R. (2005). Global circumnavigations: tracking year-round ranges of nonbreeding albatrosses. *Science* **307**, 249-250. doi:10.1126/science.1106042
- Cury, P. M., Boyd, I. L., Bonhommeau, S., Anker-Nilssen, T., Crawford, R. J. M., Furness, R. W., Mills, J. A., Murphy, E. J., Osterblom, H., Paleczny, M. et al. (2011). Global seabird response to forage fish depletion - one-third for the birds. *Science* **334**, 1703-1705. doi:10.1126/science.1212928
- Danckwerts, D. K., McQuaid, C. D., Jaeger, A., McGregor, G. K., Dwight, R., LeCorre, M. and Jaquemot, S. (2014). Biomass consumption by breeding seabirds in the western Indian Ocean: indirect interactions with fisheries and implications for management. *ICES J. Mar. Sci.* **71**, 2589-2598. doi:10.1093/icesjms/fsu093
- Dearborn, D. C., Anders, A. D. and Williams, J. B. (2005). Courtship display by great frigatebirds, *Fregata minor*: An energetically costly handicap signal? *Behav. Ecol. Sociobiol.* **58**, 397-406. doi:10.1007/s00265-005-0933-7
- de Leeuw, and J. J., (1996). Diving costs as a component of daily energy budgets of aquatic birds and mammals: generalizing the inclusion of dive-recovery costs demonstrated in tufted ducks. *Can. J. Zool.* **74**, 2131-2142. doi:10.1139/z96-242
- De Vries, J. and Van Eerden, M. R. (1995). Thermal conductance in aquatic birds in relation to the degree of water contact, body mass, and body fat: energetic implications of living in a strong cooling environment. *Physiol. Zool.* **68**, 1143-1163. doi:10.1086/physzool.68.6.30163797
- Dunn, R. E., White, C. R. and Green, J. A. (2018). A model to estimate seabird field metabolic rates. *Biol. Lett.* **14**, 20180190. doi:10.1098/rsbl.2018.0190
- Dunn, R. E., Wanless, S., Daunt, F., Harris, M. P. and Green, J. A. (2020). A year in the life of a north Atlantic seabird: behavioural and energetic adjustments during the annual cycle. *Sci. Rep.* **10**, 1-11. doi:10.1038/s41598-019-56847-4
- Dunn, R. E., Green, J. A., Wanless, S., Harris, M. P., Newell, M. A., Bogdanova, M. I., Horswill, C., Daunt, F. and Matthiopoulos, J. (2022). Modelling and mapping how common guillemots balance their energy budgets over a full annual cycle. *Funct. Ecol.* **36**, 1612-1626. doi:10.1111/1365-2435.14059
- Egevang, C., Stenhouse, I. J., Phillips, R. A., Petersen, A., Fox, J. W. and Silk, J. R. D. (2010). Tracking of Arctic terns *Sterna paradisaea* reveals longest animal migration. *Proc. Natl Acad. Sci. USA* **107**, 2078-2081. doi:10.1073/pnas.0909493107
- Elliott, K. H. and Gaston, A. J. (2014). Dive behaviour and daily energy expenditure in thick-billed murre *Uria lomvia* after leaving the breeding colony. *Mar. Ornithol.* **42**, 183-189.
- Elliott, K. H., Ricklefs, R. E., Gaston, A. J., Hatch, S. A., Speakman, J. R. and Davoren, G. K. (2013). High flight costs, but low dive costs, in auks support the biomechanical hypothesis for flightlessness in penguins. *Proc. Natl. Acad. Sci. U. S. A.* **110**, 9380-9384. doi:10.1073/pnas.1304838110
- Ellis, H. I. and Gabrielsen, G. W. (2002). Energetics of free-ranging seabirds. In *Biology of Marine Birds* (ed. E. A. Schrieber and J. Burger), pp. 359-408. CRC Press.
- Fayet, A. L., Freeman, R., Shoji, A., Boyle, D., Kirk, H. L., Dean, B. J., Perrins, C. M. and Guilford, T. (2016). Drivers and fitness consequences of dispersive migration in a pelagic seabird. *Behav. Ecol.* **27**, 1061-1072. doi:10.1093/behecol/arw013
- Fort, J., Porter, W. P. and Grémillet, D. (2009). Thermodynamic modelling predicts energetic bottleneck for seabirds wintering in the northwest Atlantic. *J. Exp. Biol.* **212**, 2483-2490. doi:10.1242/jeb.032300
- Fort, J., Porter, W. P. and Grémillet, D. (2011). Energetic modelling: a comparison of the different approaches used in seabirds. *Comp. Biochem. Physiol. A Mol. Integr. Physiol.* **158**, 358-365. doi:10.1016/j.cbpa.2010.05.004
- Graham, N. A. J., Wilson, S. K., Carr, P., Hoey, A. S., Jennings, S. and MacNeil, M. A. (2018). Seabirds enhance coral reef productivity and functioning in the absence of invasive rats. *Nature* **559**, 250-253. doi:10.1038/s41586-018-0202-3
- Green, J. A. (2011). The heart rate method for estimating metabolic rate: review and recommendations. *Comp. Biochem. Physiol. A Mol. Integr. Physiol.* **158**, 287-304. doi:10.1016/j.cbpa.2010.09.011
- Green, J. A., Halsey, L. G., Wilson, R. P. and Frappell, P. B. (2009). Estimating energy expenditure of animals using the accelerometry technique: activity, inactivity and comparison with the heart-rate technique. *J. Exp. Biol.* **212**, 471-482. doi:10.1242/jeb.026377
- Green, J. A., Aitken-Simpson, E. J., White, C. R., Bunce, A., Butler, P. J. and Frappell, P. B. (2013). An increase in minimum metabolic rate and not activity explains field metabolic rate changes in a breeding seabird. *J. Exp. Biol.* **216**, 1726-1735. doi:10.1242/jeb.085092
- Grémillet, D., Schmid, D. and Culik, B. (1995). Energy requirements of breeding great cormorants *Phalacrocorax carbo sinensis*. *Mar. Ecol. Prog. Ser.* **121**, 1-9. doi:10.3354/meps121001
- Grémillet, D., Wright, G., Lauder, A. N., Carss, D. N. and Wanless, S. (2003). Modelling the daily food requirements of wintering great cormorants: A bioenergetics tool for wildlife management. *J. Appl. Ecol.* **40**, 266-277. doi:10.1046/j.1365-2664.2003.00806.x
- Grémillet, D., Kuntz, G., Woakes, A. J., Gilbert, C., Robin, J. P., Maho, Y. L. and Butler, P. J. (2005). Year-round recordings of behavioural and physiological parameters reveal the survival strategy of a poorly insulated diving endotherm during the Arctic winter. *J. Exp. Biol.* **208**, 4231-4241. doi:10.1242/jeb.01884
- Harris, M. P., Wanless, S., Ballesteros, M., Moe, B., Daunt, F. and Erikstad, K. E. (2015). Geolocators reveal an unsuspected moulting area for Isle of May common guillemots *Uria aalge*. *Bird Study* **62**, 267-270. doi:10.1080/00063657.2015.1006164
- Jodice, P. G. R., Roby, D. D., Suryan, R. M., Irons, D. B., Kaufman, A. M., Turco, K. R. and Visser, G. H. (2003). Variation in energy expenditure among black-legged kittiwakes: effects of activity-specific metabolic rates and activity budgets. *Physiol. Biochem. Zool.* **76**, 375-388. doi:10.1086/375431
- Karpouzi, V. S., Watson, R. and Pauly, D. (2007). Modelling and mapping resource overlap between seabirds and fisheries on a global scale: A preliminary assessment. *Mar. Ecol. Prog. Ser.* **343**, 87-99. doi:10.3354/meps06860
- Kendeigh, S. C., Dol'Nik, V. R. and Gavrilov, V. M. (1977). Avian energetics. In *Granivorous Birds in Ecosystems: Their Evolution, Populations, Energetics, Adaptations, Impact and Control* (ed. J. Pinowski and S. C. Kendeigh), pp. 127-158. Cambridge: Cambridge University Press.
- Knower Stockard, T., Heil, J., Meir, J. U., Sato, K., Ponganis, K. V. and Ponganis, P. J. (2005). Air sac PO<sub>2</sub> and oxygen depletion during dives of emperor penguins. *J. Exp. Biol.* **208**, 2973-2980. doi:10.1242/jeb.01687
- Lerma, M., Castillo-Guerrero, J. A., Hernández-Vázquez, S. and Garthe, S. (2020). Foraging ecology of a marine top predator in the Eastern Tropical Pacific over 3 years with different ENSO phases. *Mar. Biol.* **167**, 1-11. doi:10.1007/s00227-019-3618-x
- Lowe, C. G. (2002). Bioenergetics of free-ranging juvenile scalloped hammerhead sharks (*Sphyrna lewini*) in Kāne'ohe Bay, O'ahu, HI. *J. Exp. Mar. Biol. Ecol.* **278**, 141-156. doi:10.1016/S0022-0981(02)00331-3
- Masden, E. A., Haydon, D. T., Fox, A. D. and Furness, R. W. (2010). Barriers to movement: Modelling energetic costs of avoiding marine wind farms amongst breeding seabirds. *Mar. Pollut. Bull.* **60**, 1085-1091. doi:10.1016/j.marpolbul.2010.01.016
- McCauley, D. J., Young, H. S., Dunbar, R. B., Estes, J. A., Semmens, B. X. and Micheli, F. (2012). Assessing the effects of large mobile predators on ecosystem connectivity. *Ecol. Appl.* **22**, 1711-1717. doi:10.1890/11-1653.1
- McKechnie, A. E. and Wolf, B. O. (2004). The allometry of avian basal metabolic rate: good predictions need good data. *Physiol. Biochem. Zool.* **77**, 502-521. doi:10.1086/383511
- McKinney, R. A. and McWilliams, S. R. (2005). A new model to estimate daily energy expenditure for wintering waterfowl. *Wilson Bull.* **117**, 44-55. doi:10.1676/04-060
- Morton, J. M., Fowler, A. C. and Kirkpatrick, R. L. (1989). Time and energy budgets of American black ducks in winter. *J. Wildl. Manage.* **53**, 401. doi:10.2307/3801143
- Nagy, K. A., Siegfried, W. R. and Wilson, R. P. (1984). Energy utilization by free-ranging jackass penguins, *Spheniscus demersus*. *Ecology* **65**, 1648-1655. doi:10.2307/1939143
- Oswald, S. A. and Arnold, J. M. (2012). Direct impacts of climatic warming on heat stress in endothermic species: seabirds as bioindicators of changing thermoregulatory constraints. *Integr. Zool.* **7**, 121-136. doi:10.1111/j.1749-4877.2012.00287.x
- Regular, P. M., Hedd, A., Montevecchi, W. A., Robertson, G. J., Storey, A. E. and Walsh, C. J. (2014). Why timing is everything: Energetic costs and reproductive consequences of resource mismatch for a chick-rearing seabird. *Ecosphere* **5**, 1-13. doi:10.1890/ES14-00182.1
- Ricklefs, R. E. and Wikelski, M. (2002). The physiology/life-history nexus. *Trends Ecol. Evol.* **17**, 462-468. doi:10.1016/S0169-5347(02)02578-8
- Rogalla, S., Nicolai, M. P. J., Porchetta, S., Glabeke, G., Battistella, C., D'Alba, L., Gianneschi, N. C., van Beeck, J. and Shawkey, M. D. (2021). The evolution of darker wings in seabirds in relation to temperature-dependent flight efficiency. *J. R. Soc. Interface* **18**, 20210236. doi:10.1098/rsif.2021.0236
- Sakamoto, K. Q., Takahashi, A., Iwata, T., Yamamoto, T., Yamamoto, M. and Trathan, P. N. (2013). Heart rate and estimated energy expenditure of flapping and gliding in black-browed albatrosses. *J. Exp. Biol.* **216**, 3175-3182. doi:10.1242/jeb.079905
- Schmitz, O. J., Hawlena, D. and Trussell, G. C. (2010). Predator control of ecosystem nutrient dynamics. *Ecol. Lett.* **13**, 1199-1209. doi:10.1111/j.1461-0248.2010.01511.x



- Schraft, H. A., Whelan, S. and Elliott, K. H.** (2019). Huffin' and puffin: Seabirds use large bills to dissipate heat from energetically demanding flight. *J. Exp. Biol.* **222**, 1-3. doi:10.1242/jeb.212563
- Searle, K. R., Regan, C. E., Perrow, M. R., Butler, A., Rindorf, A., Harris, M. P., Newell, M. A., Wanless, S. and Daunt, F.** (2023). Effects of a fishery closure and prey abundance on seabird diet and breeding success: Implications for strategic fisheries management and seabird conservation. *Biol. Conserv.* **281**, 109990. doi:10.1016/j.biocon.2023.109990
- Shaffer, S. A.** (2011). A review of seabird energetics using the doubly labeled water method. *Comp. Biochem. Physiol. A Mol. Integr. Physiol.* **158**, 315-322. doi:10.1016/j.cbpa.2010.07.012
- Sherley, R. B., Ladd-Jones, H., Garthe, S., Stevenson, O. and Votier, S. C.** (2020). Scavenger communities and fisheries waste: North Sea discards support 3 million seabirds, 2 million fewer than in 1990. *Fish Fish.* **21**, 132-145. doi:10.1111/faf.12422
- Sparling, C. E., Thompson, D., Fedak, M. A., Gallon, S. L. and Speakman, J. R.** (2008). Estimating field metabolic rates of pinnipeds: doubly labelled water gets the seal of approval. *Funct. Ecol.* **22**, 245-254. doi:10.1111/j.1365-2435.2007.01368.x
- Stothart, M. R., Elliott, K. H., Wood, T., Hatch, S. A. and Speakman, J. R.** (2016). Counting calories in cormorants: dynamic body acceleration predicts daily energy expenditure measured in pelagic cormorants. *J. Exp. Biol.* **219**, 2192-2200. doi:10.1242/jeb.130526
- Tanton, J. L., Reid, K., Croxall, J. P. and Trathan, P. N.** (2004). Winter distribution and behaviour of gentoo penguins *Pygoscelis papua* at South Georgia. *Polar Biol.* **27**, 299-303. doi:10.1007/s00300-004-0592-6
- Tomlinson, S., Arnall, S. G., Munn, A., Bradshaw, S. D., Maloney, S. K., Dixon, K. W. and Didham, R. K.** (2014). Applications and implications of ecological energetics. *Trends Ecol. Evol.* **29**, 280-290. doi:10.1016/j.tree.2014.03.003
- Votier, S. C., Bearhop, S., Ratcliffe, N., Phillips, R. A. and Furness, R. W.** (2004). Predation by great skuas at a large Shetland seabird colony. *J. Appl. Ecol.* **41**, 1117-1128. doi:10.1111/j.0021-8901.2004.00974.x
- Weimerskirch, H., Shaffer, S. A., Mabile, G., Martin, J., Boutard, O. and Rouanet, J. L.** (2002). Heart rate and energy expenditure of incubating wandering albatrosses: basal levels, natural variation, and the effects of human disturbance. *J. Exp. Biol.* **205**, 475-483. doi:10.1242/jeb.205.4.475
- Weimerskirch, H., Bishop, C., Jeanniard-du-Dot, T., Prudor, A. and Sachs, G.** (2016). Frigate birds track atmospheric conditions over months-long transoceanic flights. *Science* **353**, 74-78. doi:10.1126/science.aaf4374
- Wienecke, B. C. and Robertson, G.** (1997). Foraging space of emperor penguins *Aptenodytes forsteri* in Antarctic shelf waters in winter. *Mar. Ecol. Prog. Ser.* **159**, 249-263. doi:10.3354/meps159249
- Wooley, J. B. and Owen, R. B.** (1978). Energy costs of activity and daily energy expenditure in the black duck. *J. Wildl. Manage.* **42**, 739. doi:10.2307/3800764
